# Supplementary material for: On the reaction mechanism of redox transmetallation of elemental Yb with Hg(C6F5)2 and subsequent reactivity of Yb(C6F5)2 with pyrazole: a DFT investigation
Source: Royal Society of Chemistry journal article supplement (doi:10.1039/c5cc05439g), 2015-01-01
Supplement: c5cc05439g1.pdf [file c5cc05439g1.pdf]

# On the reaction mechanism of redox trans metallation of elemental Yb by Hg(C<sub>6</sub>F<sub>5</sub>)<sub>2</sub> and subsequent reactivity of Yb(C<sub>6</sub>F<sub>5</sub>)<sub>2</sub> with Pyrazole: A DFT investigation<sup>†</sup>

Julia Lefèvre,<sup>a</sup> Glen B. Deacon,<sup>b</sup> Peter C. Junk,<sup>c</sup> and Laurent Maron<sup>a</sup>

## Computational details

All the quantum chemical calculations were performed using Gaussian 09 suite software.<sup>1</sup> Unless specified, the B3PW91<sup>2,3</sup> functional was considered in all the geometry optimisations without imposing any constraint and in the gas phase. The gas phase is appropriate in this case since the experiment were carried out in not polar and coordinating solvent (cyclohexane) so that no specific interactions may modify the reaction pathway determined in the gas phase. Two different Stuttgart-Dresden scalar relativistic effective core potentials were used for Yb atoms; both the small core ECP in combination with its adapted basis set<sup>4</sup> and the 4*f*-in-core ECP (augmented by a *f* polarisation function,  $\alpha = 1.0$ ) for the mechanism exploration.<sup>5</sup> The latter was only used to compare the pyrazole activation mechanism obtained with small core RECPs (explicit *f*) that are reported in the manuscript with the one obtained with a fixed oxidation state (+II), that are not reported in the text. Hg and Fluorine atoms were represented by the Stuttgart-Dresden effective core potential, and their associated basis set <sup>6,7</sup> Carbon, nitrogen and hydrogen atoms were represented by the 6-31G(d,p) basis set.<sup>8</sup> In all the calculations, spin-orbit effects were neglected. The nature of the optimised extrema (minimum or transition state) was confirmed with an analytical frequency calculation. The connectivity in the transition states was verified by following the Intrinsic Reaction Coordinates (IRC). The zero-point energy (ZPE) and entropic contribution were calculated within the harmonic potential approximation. Enthalpies were calculated at 298.15 K and 1 atm. Electron affinities have been computed according to the following the electron convention:  $\Delta_f H^\circ(e^-, 0\text{ K}) = 0$  kcal mol<sup>-1</sup>. Calculated values correspond to the electronic values at 0 K corrected by the zero-point vibrational energy (ZPVE) in gas phase.<sup>9</sup> Basis Set Superposition Errors (BSSE) were estimated for the least stabilized complexes and was found to be negligible (less than 0.05 kcal/mol) using counterpoise corrections. Natural Bonding Orbital (NBO) and Natural Population Analysis (NPA) were performed to analyse the bonding<sup>10</sup>. In the case of the NBO analysis, Wiberg bond indexes were determined.

1 Gaussian 09, Revision D.01, M. J. Frisch, G. W. Trucks, H. B. Schlegel, G. E. Scuseria, M. A. Robb, J. R. Cheeseman, G. Scalmani, V. Barone, B. Mennucci, G. A. Petersson, H. Nakatsuji, M. Caricato, X. Li, H. P. Hratchian, A. F. Izmaylov, J. Bloino, G. Zheng, J. L. Sonnenberg, M. Hada, M. Ehara, K. Toyota, R. Fukuda, J. Hasegawa, M. Ishida, T. Nakajima, Y. Honda, O. Kitao, H. Nakai, T. Vreven, J. A. Montgomery, Jr., J. E. Peralta, F. Ogliaro, M. Bearpark, J. J. Heyd, E. Brothers, K. N. Kudin, V. N. Staroverov, R. Kobayashi, J. Normand, K. Raghavachari, A. Rendell, J. C. Burant, S. S. Iyengar, J. Tomasi, M. Cossi, N. Rega, J. M. Millam, M. Klene, J. E. Knox, J. B. Cross, V. Bakken, C. Adamo, J. Jaramillo, R. Gomperts, R. E. Stratmann, O. Yazyev, A. J. Austin, R. Cammi, C. Pomelli, J. W. Ochterski, R. L. Martin, K. Morokuma, V. G. Zakrzewski, G. A. Voth, P. Salvador, J. J. Dannenberg, S. Dapprich, A. D. Daniels, Ö. Farkas, J. B. Foresman, J. V. Ortiz, J. Cioslowski and D. J. Fox, Gaussian, Inc., Wallingford CT, 2009.

2 A. D. Becke, *J. Chem. Phys.*, 1993, **98**, 5648-5662.

3 J. P. Perdew and Y. Wang, *Phys. Rev. B*, 1992, **45**, 13244-13249.

4 M. Dolg, H. Stoll and H. Preuss, *J. Chem. Phys.*, 1989, **90**, 1730-1734.

5 (a) M. Dolg, H. Stoll, A. Savin and H. Preuss, *Theor. Chim. Acta*, 1989, **75**, 173-194; (b) M. Dolg, H. Stoll and H. Preuss, *Theor. Chim. Acta*, 1993, **85**, 441-450.

6 D. Andrae, U. Haeussermann, M. Dolg, H. Stoll, H. Preuss, *Theor. Chim. Acta* 1990, **77**, 123

- 7 A. Bergner, M. Dolg, W. Kuechle, H. Stoll and H. Preuss, *Mol. Phys.*, 1993, **80**, 1431-1441.  
 8 P. C. Hariharan and J. A. Pople, *Theor. Chem. Acc.*, 1973, **28**, 213-222.  
 9 J. C. Rienstra-Kiracofe, G. S. Tschumper, H. F. Schaefer III, S. Nandi and G. B. Ellison, *Chem. Rev.*, 2002, **102**, 231-282.  
 10 a) A. E. Reed, L. A. Agartiss and F. Weinhold, *Chem. Rev.*, 1988, **88**, 899-926; b) F. Weinhold, *In The Encyclopedia of Computational Chemistry*; P. v. R., Schleyer, Ed., John Wiley & Sons.

### Cartesian coordinates of all optimized structures and associated energies

Yb :

scf done: -1159,57180572

HgC6F5\_2

23

scf done: -1608.598513

|    |           |           |           |
|----|-----------|-----------|-----------|
| C  | -0.000012 | -0.000394 | 2.077332  |
| Hg | -0.000023 | -0.000854 | 0.000021  |
| C  | -0.000020 | -0.000320 | -2.077334 |
| C  | -1.186257 | -0.000464 | -2.798660 |
| C  | -1.208457 | -0.000117 | -4.189743 |
| C  | 0.000008  | 0.000394  | -4.883287 |
| C  | 1.208459  | 0.000552  | -4.189719 |
| C  | 1.186232  | 0.000191  | -2.798636 |
| F  | -2.362982 | -0.000958 | -2.149876 |
| F  | -2.359235 | -0.000266 | -4.861394 |
| F  | 0.000022  | 0.000733  | -6.212658 |
| F  | 2.359251  | 0.001042  | -4.861346 |
| F  | 2.362944  | 0.000354  | -2.149827 |
| C  | -0.000119 | 1.186009  | 2.798385  |
| C  | -0.000106 | 1.208530  | 4.189463  |
| C  | 0.000017  | 0.000226  | 4.883287  |
| C  | 0.000126  | -1.208385 | 4.189996  |
| C  | 0.000109  | -1.186478 | 2.798908  |
| F  | -0.000238 | 2.362584  | 2.149327  |
| F  | -0.000208 | 2.359464  | 4.860846  |
| F  | 0.000031  | 0.000519  | 6.212657  |
| F  | 0.000244  | -2.359023 | 4.861887  |
| F  | 0.000214  | -2.363340 | 2.150370  |

YbFC6F4-Hg-C6F5mnr-opt (adduit du TS1) :

24

scf done: -2768,17193874

|    |           |           |           |           |
|----|-----------|-----------|-----------|-----------|
| C  | 1.000366  | -0.449395 | -3.107217 | 0.374849  |
| C  | -0.198055 | -0.386490 | -2.408904 | -0.401334 |
| C  | -1.366596 | -0.275572 | -3.150532 | 0.374759  |
| C  | -1.359826 | -0.227552 | -4.540889 | 0.281906  |
| C  | -0.140068 | -0.292811 | -5.211476 | 0.295989  |
| C  | 1.050927  | -0.404373 | -4.496755 | 0.282045  |
| Hg | -0.241446 | -0.453518 | -0.335081 | 60.525346 |
| Yb | 1.813563  | 4.481614  | 3.522702  | 27.946484 |
| F  | -2.552464 | -0.211129 | -2.522239 | -0.298065 |
| F  | -2.492948 | -0.120706 | -5.233172 | -0.289601 |
| F  | -0.112334 | -0.248700 | -6.539644 | -0.285766 |
| F  | 2.211716  | -0.466469 | -5.147299 | -0.289529 |
| F  | 2.159360  | -0.557440 | -2.436446 | -0.297723 |
| C  | -0.285983 | -0.520280 | 1.743779  | -0.390701 |
| C  | -0.775969 | -1.632353 | 2.415810  | 0.375930  |
| C  | -0.819413 | -1.703748 | 3.805267  | 0.283229  |
| C  | -0.354719 | -0.622882 | 4.551620  | 0.305471  |
| C  | 0.143398  | 0.506164  | 3.906508  | 0.277203  |
| C  | 0.168148  | 0.537137  | 2.518678  | 0.371542  |
| F  | -1.229035 | -2.686582 | 1.718722  | -0.295704 |
| F  | 0.655840  | 1.646018  | 1.919446  | -0.291928 |
| F  | 0.589344  | 1.542168  | 4.632649  | -0.284335 |

|   |           |           |          |           |
|---|-----------|-----------|----------|-----------|
| F | -0.386693 | -0.669726 | 5.878673 | -0.282908 |
| F | -1.294814 | -2.781789 | 4.425196 | -0.287401 |

YbFC6F4-Hg-C6F5 (TS1) :

24

scf done: -2768.170865

|    |           |           |           |
|----|-----------|-----------|-----------|
| C  | 0.995510  | -0.641011 | -2.933592 |
| C  | -0.142316 | -0.242439 | -2.244594 |
| C  | -1.199257 | 0.261749  | -2.991263 |
| C  | -1.141265 | 0.373244  | -4.376826 |
| C  | 0.015359  | -0.035685 | -5.037877 |
| C  | 1.093770  | -0.547016 | -4.318356 |
| Hg | -0.262146 | -0.393478 | -0.177142 |
| Yb | 2.137292  | 3.757416  | 1.931634  |
| F  | -2.323426 | 0.661355  | -2.372725 |
| F  | -2.167084 | 0.860672  | -5.073753 |
| F  | 0.090200  | 0.062076  | -6.361620 |
| F  | 2.194848  | -0.935802 | -4.959991 |
| F  | 2.045460  | -1.138049 | -2.258911 |
| C  | -0.382143 | -0.544727 | 1.893201  |
| C  | -0.352569 | -1.776734 | 2.533370  |
| C  | -0.404671 | -1.895050 | 3.919032  |
| C  | -0.486586 | -0.740575 | 4.694347  |
| C  | -0.518775 | 0.512031  | 4.085025  |
| C  | -0.473138 | 0.581800  | 2.698114  |
| F  | -0.265687 | -2.903980 | 1.809061  |
| F  | -0.509497 | 1.813640  | 2.133615  |
| F  | -0.591499 | 1.615087  | 4.829751  |
| F  | -0.535217 | -0.834895 | 6.019004  |
| F  | -0.374865 | -3.088042 | 4.509892  |

YbFC6F4-Hg-C6F5mnf-opt (produit TS1) :

24

scf done: -2768,17463298

|    |           |           |           |           |
|----|-----------|-----------|-----------|-----------|
| C  | 1.079460  | -0.539981 | -2.787830 | 0.370191  |
| C  | 0.002482  | -0.009072 | -2.091318 | -0.386576 |
| C  | -1.020788 | 0.558692  | -2.837585 | 0.372496  |
| C  | -0.986952 | 0.610116  | -4.226995 | 0.277440  |
| C  | 0.110140  | 0.070435  | -4.895426 | 0.290639  |
| C  | 1.153057  | -0.510123 | -4.176441 | 0.277280  |
| Hg | -0.076168 | -0.064844 | -0.009956 | 60.475343 |
| Yb | 1.526494  | 3.013828  | 0.805208  | 28.049334 |
| F  | -2.088030 | 1.087653  | -2.211831 | -0.299790 |
| F  | -1.982425 | 1.161088  | -4.922757 | -0.293296 |
| F  | 0.161740  | 0.109118  | -6.224832 | -0.290169 |
| F  | 2.198011  | -1.026590 | -4.824208 | -0.293014 |
| F  | 2.097953  | -1.101957 | -2.113188 | -0.298208 |
| C  | -0.325393 | -0.399718 | 2.045023  | -0.351442 |
| C  | -0.218429 | -1.687300 | 2.557867  | 0.366569  |
| C  | -0.357932 | -1.967114 | 3.913970  | 0.287551  |
| C  | -0.616958 | -0.921899 | 4.797917  | 0.290164  |
| C  | -0.727278 | 0.383154  | 4.322925  | 0.289261  |
| C  | -0.585239 | 0.610629  | 2.959448  | 0.332719  |
| F  | 0.033275  | -2.715011 | 1.730862  | -0.294209 |
| F  | -0.692251 | 1.898789  | 2.535818  | -0.305877 |
| F  | -0.970610 | 1.382694  | 5.170246  | -0.290647 |
| F  | -0.758035 | -1.168815 | 6.096757  | -0.286753 |
| F  | -0.253826 | -3.212187 | 4.375720  | -0.288884 |

C6F5-insertion-Yb-HgC6F5IRCrOPT (adduit TS2) :

24

scf done: -2768.174638

|    |           |           |           |
|----|-----------|-----------|-----------|
| C  | 1.487134  | 0.124022  | -2.182240 |
| C  | 0.210533  | 0.073370  | -1.635638 |
| Hg | -0.060745 | 0.194067  | 0.435527  |
| C  | -0.120368 | 0.112342  | 2.517468  |
| C  | 0.641484  | 0.974816  | 3.293822  |
| C  | 0.617966  | 0.940225  | 4.684077  |
| C  | -0.195948 | 0.006356  | 5.322089  |
| C  | -0.971024 | -0.876306 | 4.572464  |
| C  | -0.916928 | -0.808163 | 3.184326  |
| C  | 1.715599  | 0.053262  | -3.553006 |
| C  | 0.628009  | -0.076356 | -4.414079 |
| C  | -0.666843 | -0.128653 | -3.902453 |
| C  | -0.846290 | -0.057127 | -2.525773 |
| F  | -1.675154 | -1.667891 | 2.480104  |
| F  | 1.430799  | 1.886116  | 2.698093  |
| F  | 1.357820  | 1.780176  | 5.408790  |
| F  | -0.233136 | -0.042963 | 6.651494  |
| F  | -1.745371 | -1.768660 | 5.190901  |
| Yb | -2.783358 | 2.503260  | -0.064030 |
| F  | -2.116808 | -0.100718 | -2.061173 |
| F  | -1.705010 | -0.248944 | -4.730117 |
| F  | 0.825530  | -0.148988 | -5.727299 |
| F  | 2.950658  | 0.102433  | -4.050697 |
| F  | 2.553383  | 0.250487  | -1.374830 |

C6F5-insertion-Yb-HgC6F5 (TS2) :

24

scf done: -2768.165647

|    |           |           |           |
|----|-----------|-----------|-----------|
| C  | 0.781375  | 0.210051  | -1.626309 |
| C  | -0.554135 | 0.583830  | -1.613783 |
| Hg | -1.473551 | 1.282487  | 0.598902  |
| C  | -0.495931 | 0.506209  | 2.372393  |
| C  | 0.364323  | 1.285920  | 3.124528  |
| C  | 0.977710  | 0.815173  | 4.281945  |
| C  | 0.713682  | -0.486142 | 4.702258  |
| C  | -0.149160 | -1.296310 | 3.968404  |
| C  | -0.737669 | -0.781022 | 2.817085  |
| C  | 1.430818  | -0.271488 | -2.761488 |
| C  | 0.723258  | -0.383615 | -3.959129 |
| C  | -0.616676 | -0.010317 | -4.009612 |
| C  | -1.175248 | 0.447915  | -2.825111 |
| F  | -1.569943 | -1.588385 | 2.125601  |
| F  | 0.639895  | 2.549667  | 2.741252  |
| F  | 1.809403  | 1.584253  | 4.992380  |
| F  | 1.288674  | -0.957472 | 5.810460  |
| F  | -0.395733 | -2.544776 | 4.379045  |
| Yb | -3.229885 | 2.458214  | -1.409252 |
| F  | -2.552002 | 0.831868  | -2.944955 |
| F  | -1.306941 | -0.097733 | -5.151156 |
| F  | 1.329973  | -0.838683 | -5.054860 |
| F  | 2.716301  | -0.629490 | -2.734866 |
| F  | 1.523393  | 0.306010  | -0.505913 |

C6F5-insertion-Yb-HgC6F5IRCfOPT (produit TS2) :

24

scf done: -2768.218908

|    |           |           |           |
|----|-----------|-----------|-----------|
| C  | 0.997423  | 1.438291  | -4.259894 |
| C  | -0.034681 | 1.016319  | -3.437210 |
| Hg | -0.698148 | 0.473399  | 1.609175  |
| C  | -0.298746 | 0.037635  | 3.762251  |
| C  | 0.636527  | 0.751771  | 4.489631  |
| C  | 0.903516  | 0.500554  | 5.832369  |
| C  | 0.198714  | -0.514648 | 6.475094  |
| C  | -0.752113 | -1.256918 | 5.778306  |
| C  | -0.977301 | -0.961308 | 4.437074  |
| C  | 1.171579  | 0.952826  | -5.555000 |
| C  | 0.280488  | 0.003321  | -6.061162 |
| C  | -0.777619 | -0.457249 | -5.279024 |
| C  | -0.865688 | 0.085486  | -4.007437 |
| F  | -1.908076 | -1.700863 | 3.789698  |
| F  | 1.337770  | 1.745110  | 3.896033  |
| F  | 1.813270  | 1.206641  | 6.513468  |
| F  | 0.434396  | -0.776468 | 7.762219  |
| F  | -1.422868 | -2.228885 | 6.407512  |
| Yb | -1.254854 | 1.033588  | -1.331496 |
| F  | -1.943743 | -0.375736 | -3.193336 |
| F  | -1.634641 | -1.362631 | -5.754009 |
| F  | 0.441542  | -0.462256 | -7.298130 |
| F  | 2.171618  | 1.375467  | -6.330599 |
| F  | 1.883566  | 2.352718  | -3.827712 |

C6F5-Yb-Hg-C6F5fopt (adduit TS3) :

24

scf done: -2768.218922

|    |           |           |           |
|----|-----------|-----------|-----------|
| C  | -1.629799 | 1.296827  | -4.165843 |
| C  | -1.796254 | 0.417243  | -3.108088 |
| C  | -2.189563 | -0.843400 | -3.479338 |
| C  | -2.426641 | -1.309379 | -4.762276 |
| C  | -2.242242 | -0.381534 | -5.786278 |
| C  | -1.843770 | 0.924840  | -5.492191 |
| Yb | -1.737880 | -0.133097 | -0.738909 |
| F  | -2.374550 | -1.780897 | -2.418759 |
| F  | -2.808717 | -2.558628 | -5.032903 |
| F  | -2.448782 | -0.741568 | -7.051390 |
| F  | -1.679109 | 1.789141  | -6.495169 |
| F  | -1.250537 | 2.567440  | -3.942830 |
| Hg | 0.212131  | 0.014230  | 1.596378  |
| C  | 1.616445  | 0.120637  | 3.329391  |
| C  | 2.988964  | 0.064559  | 3.165375  |
| C  | 3.881391  | 0.129096  | 4.231611  |
| C  | 3.372819  | 0.255744  | 5.522340  |
| C  | 1.996731  | 0.315651  | 5.730291  |
| C  | 1.152138  | 0.246598  | 4.626323  |
| F  | 3.516081  | -0.058055 | 1.925515  |
| F  | -0.179586 | 0.307811  | 4.863432  |
| F  | 1.520398  | 0.436808  | 6.974958  |
| F  | 4.206491  | 0.319853  | 6.562419  |
| F  | 5.205106  | 0.072824  | 4.045964  |

C6F5-Yb-Hg-C6F5 (TS3) :

24

scf done: -2768.207541

|    |           |           |           |
|----|-----------|-----------|-----------|
| C  | 1.444103  | -0.345852 | 3.307287  |
| C  | 0.548097  | -0.398103 | 2.257607  |
| C  | -0.787187 | -0.312878 | 2.592054  |
| C  | -1.258109 | -0.182727 | 3.892640  |
| C  | -0.320032 | -0.134707 | 4.921961  |
| C  | 1.041738  | -0.216087 | 4.634920  |
| Hg | 0.851501  | -0.598996 | -0.016643 |
| Yb | -1.463026 | -0.624717 | -1.867415 |
| F  | -1.746654 | -0.356606 | 1.597301  |
| F  | -2.564679 | -0.103556 | 4.175434  |
| F  | -0.727829 | -0.010288 | 6.186708  |
| F  | 1.925164  | -0.167727 | 5.637958  |
| F  | 2.771312  | -0.421550 | 3.069694  |
| C  | -2.343791 | -0.078345 | -4.055567 |
| C  | -2.911456 | -1.314614 | -4.232884 |
| C  | -3.617777 | -1.767059 | -5.335232 |
| C  | -3.762579 | -0.852057 | -6.377197 |
| C  | -3.214655 | 0.429038  | -6.274269 |
| C  | -2.519501 | 0.790012  | -5.121046 |
| F  | -2.750548 | -2.236057 | -3.155405 |
| F  | -4.137854 | -2.991794 | -5.424196 |
| F  | -4.427446 | -1.200682 | -7.476357 |
| F  | -3.373111 | 1.280633  | -7.288629 |
| F  | -2.016116 | 2.035312  | -5.075972 |

C6F5-Yb-Hg-C6F5IRCr (produit TS3) :

24

scf done: -2768.260886

|    |           |           |           |
|----|-----------|-----------|-----------|
| C  | 1.260615  | 0.700860  | 2.906110  |
| C  | 0.370328  | 0.011835  | 2.102403  |
| C  | -0.779666 | -0.379767 | 2.739833  |
| C  | -1.120582 | -0.156262 | 4.064593  |
| C  | -0.185075 | 0.543152  | 4.825422  |
| C  | 1.011857  | 0.975115  | 4.249540  |
| Hg | 2.839480  | -0.066114 | -0.923310 |
| Yb | -0.283558 | -0.937824 | -0.062571 |
| F  | -1.719457 | -1.091704 | 1.951183  |
| F  | -2.266233 | -0.571748 | 4.610493  |
| F  | -0.432835 | 0.800016  | 6.109720  |
| F  | 1.889228  | 1.640950  | 5.005266  |
| F  | 2.436709  | 1.141335  | 2.405630  |
| C  | -0.934013 | 0.017559  | -2.208814 |
| C  | -1.932121 | -0.892027 | -2.456318 |
| C  | -2.758872 | -0.941156 | -3.567906 |
| C  | -2.547055 | 0.043019  | -4.532106 |
| C  | -1.546488 | 1.001088  | -4.354671 |
| C  | -0.765251 | 0.967357  | -3.201132 |
| F  | -2.131248 | -1.890585 | -1.471491 |
| F  | -3.711278 | -1.862423 | -3.735609 |
| F  | -3.299615 | 0.067028  | -5.632092 |
| F  | -1.363048 | 1.926708  | -5.300129 |
| F  | 0.192842  | 1.910992  | -3.087815 |

Hg :

scf done: -153,613110139

YbC6F5\_2

23

scf done: -2614.634684

|    |           |           |           |
|----|-----------|-----------|-----------|
| C  | -0.493252 | 0.387179  | 2.166868  |
| Yb | -1.163209 | 0.953016  | -0.086456 |
| C  | 0.038826  | 0.654835  | -2.175906 |
| C  | -0.925190 | -0.158188 | -2.715864 |
| C  | -0.915097 | -0.761646 | -3.963110 |
| C  | 0.206181  | -0.506601 | -4.750943 |
| C  | 1.232401  | 0.312043  | -4.273749 |
| C  | 1.129178  | 0.873608  | -3.001920 |
| F  | -2.065683 | -0.410340 | -1.898246 |
| F  | -1.900773 | -1.541779 | -4.411761 |
| F  | 0.298784  | -1.044907 | -5.966115 |
| F  | 2.291649  | 0.538559  | -5.054028 |
| F  | 2.145877  | 1.655792  | -2.597584 |
| C  | 0.203317  | 1.244304  | 2.996380  |
| C  | 0.605409  | 0.915321  | 4.286363  |
| C  | 0.284034  | -0.352451 | 4.771617  |
| C  | -0.421715 | -1.256423 | 3.977523  |
| C  | -0.788563 | -0.852466 | 2.698788  |
| F  | 0.515990  | 2.488763  | 2.536605  |
| F  | 1.278376  | 1.768944  | 5.065160  |
| F  | 0.652074  | -0.701823 | 6.004994  |
| F  | -0.724045 | -2.465797 | 4.461177  |
| F  | -1.484570 | -1.739945 | 1.930208  |

LH:

15

scf done: -304.736589

|   |           |           |           |
|---|-----------|-----------|-----------|
| C | 0.037935  | 0.000000  | -0.043704 |
| C | 0.047962  | 0.000000  | 1.371743  |
| N | 1.294698  | 0.000000  | 1.840676  |
| N | 2.066986  | 0.000000  | 0.738187  |
| C | 1.367495  | 0.000000  | -0.425477 |
| H | -0.821723 | 0.000000  | -0.699054 |
| C | 2.021003  | 0.000000  | -1.766477 |
| H | 1.261508  | 0.000000  | -2.550946 |
| H | 2.651142  | 0.884855  | -1.914421 |
| H | 2.651142  | -0.884856 | -1.914421 |
| H | 3.068263  | 0.000000  | 0.847528  |
| C | -1.122456 | 0.000000  | 2.304451  |
| H | -2.061907 | -0.000001 | 1.746069  |
| H | -1.112309 | -0.881958 | 2.952968  |
| H | -1.112310 | 0.881959  | 2.952967  |



YbC6F5\_2-LIRCfopt (adduit TS1) :

38

scf done: -2919.431651

|    |           |           |           |
|----|-----------|-----------|-----------|
| C  | -0.411373 | 2.270985  | -1.878880 |
| C  | 0.327979  | 1.150264  | -2.171411 |
| C  | 0.739425  | 1.086760  | -3.485725 |
| C  | 0.440457  | 2.045689  | -4.448174 |
| C  | -0.327172 | 3.149983  | -4.074782 |
| C  | -0.769053 | 3.282086  | -2.759077 |
| F  | 1.515185  | 0.034397  | -3.900895 |
| Yb | 0.207798  | 0.215608  | 0.165873  |
| C  | -1.363720 | -0.961531 | 1.657394  |
| C  | -2.305059 | -1.947225 | 1.899910  |
| C  | -2.918316 | -2.120670 | 3.139585  |
| C  | -2.580553 | -1.273262 | 4.196466  |
| C  | -1.638293 | -0.263591 | 4.011897  |
| C  | -1.084753 | -0.170839 | 2.743820  |
| F  | -2.671473 | -2.798373 | 0.920003  |
| F  | -3.824412 | -3.082342 | 3.347592  |
| F  | -3.161009 | -1.432425 | 5.387768  |
| F  | -1.308289 | 0.549974  | 5.020744  |
| F  | -0.122538 | 0.854156  | 2.553752  |
| F  | 0.867008  | 1.941787  | -5.710758 |
| F  | -0.629843 | 4.084551  | -4.976579 |
| F  | -1.494475 | 4.342868  | -2.396615 |
| F  | -0.839619 | 2.413211  | -0.549001 |
| N  | 2.771723  | -1.106296 | -1.433949 |
| H  | 2.298386  | -0.606568 | -2.182581 |
| N  | 2.254396  | -1.080096 | -0.184793 |
| C  | 3.045783  | -1.882370 | 0.546349  |
| C  | 4.065048  | -2.415496 | -0.257627 |
| C  | 3.855356  | -1.898808 | -1.530866 |
| C  | 2.796881  | -2.093238 | 2.004391  |
| H  | 3.135444  | -3.085514 | 2.312007  |
| H  | 3.336000  | -1.357930 | 2.612432  |
| H  | 1.731472  | -2.015148 | 2.240964  |
| H  | 4.849677  | -3.093153 | 0.045604  |
| C  | 4.583804  | -2.089531 | -2.818298 |
| H  | 5.608145  | -1.710665 | -2.747537 |
| H  | 4.640395  | -3.150467 | -3.078672 |
| H  | 4.083916  | -1.564970 | -3.636267 |

YbC6F5\_2-L (TS1):

38

scf done: -2919.414742

|    |           |           |           |
|----|-----------|-----------|-----------|
| C  | 0.237103  | -0.270843 | -2.359309 |
| C  | 1.547435  | -0.114926 | -1.955294 |
| C  | 2.150527  | 1.064177  | -2.376552 |
| C  | 1.491638  | 2.016745  | -3.149779 |
| C  | 0.164159  | 1.796223  | -3.519196 |
| C  | -0.494692 | 0.638568  | -3.109669 |
| F  | 3.429826  | 1.313927  | -2.050885 |
| Yb | 0.713183  | -1.552267 | 0.253385  |
| C  | -0.842510 | -1.665176 | 2.145014  |
| C  | -1.905730 | -2.244058 | 2.816347  |
| C  | -2.373868 | -1.770002 | 4.040671  |
| C  | -1.756063 | -0.665702 | 4.630920  |
| C  | -0.680107 | -0.042581 | 4.001345  |
| C  | -0.289039 | -0.587401 | 2.788225  |
| F  | -2.541633 | -3.313340 | 2.297158  |
| F  | -3.403213 | -2.346373 | 4.669359  |
| F  | -2.197578 | -0.205693 | 5.802560  |
| F  | -0.084257 | 1.014480  | 4.560930  |
| F  | 0.806364  | 0.037354  | 2.136624  |
| F  | 2.101598  | 3.132675  | -3.545816 |
| F  | -0.478837 | 2.700250  | -4.251223 |
| F  | -1.768297 | 0.432835  | -3.439595 |
| F  | -0.441114 | -1.408567 | -1.922989 |
| N  | 3.108132  | -2.140427 | -1.062246 |
| H  | 2.386723  | -1.126946 | -1.520161 |
| N  | 2.501354  | -2.990559 | -0.176283 |
| C  | 3.342193  | -4.017007 | 0.040520  |
| C  | 4.501251  | -3.830818 | -0.719895 |
| C  | 4.311256  | -2.629530 | -1.406632 |
| C  | 2.990059  | -5.122605 | 0.982407  |
| H  | 3.021220  | -6.095425 | 0.480951  |
| H  | 3.688921  | -5.167449 | 1.824477  |
| H  | 1.983571  | -4.983351 | 1.386122  |
| H  | 5.366792  | -4.477237 | -0.765026 |
| C  | 5.193656  | -1.927472 | -2.387291 |
| H  | 6.244707  | -2.026333 | -2.102797 |
| H  | 5.084901  | -2.348233 | -3.393609 |
| H  | 4.952052  | -0.863316 | -2.438773 |

YbC6F5\_2-LIRCropt (produit TS1) :

38

scf done: -2919.443025

|    |           |           |           |
|----|-----------|-----------|-----------|
| C  | -0.009620 | 1.002640  | -2.465761 |
| C  | 1.276775  | 0.630043  | -2.808837 |
| C  | 1.714336  | 0.949100  | -4.087695 |
| C  | 0.888323  | 1.616328  | -4.991364 |
| C  | -0.402954 | 1.973677  | -4.610118 |
| C  | -0.866875 | 1.665892  | -3.332430 |
| F  | 2.943664  | 0.619333  | -4.476903 |
| Yb | 0.145937  | -0.641920 | 0.766128  |
| C  | -1.169605 | -0.777259 | 2.851173  |
| C  | -1.914364 | -1.498387 | 3.768379  |
| C  | -2.464345 | -0.927223 | 4.914777  |
| C  | -2.266136 | 0.431554  | 5.165914  |
| C  | -1.525331 | 1.207900  | 4.277273  |
| C  | -1.019068 | 0.550107  | 3.166501  |
| F  | -2.142788 | -2.814472 | 3.580060  |
| F  | -3.181213 | -1.647288 | 5.784768  |
| F  | -2.789057 | 0.988793  | 6.260303  |
| F  | -1.332889 | 2.510511  | 4.512164  |
| F  | -0.265489 | 1.335881  | 2.261664  |
| F  | 1.321087  | 1.914162  | -6.212059 |
| F  | -1.196358 | 2.608872  | -5.464473 |
| F  | -2.098278 | 2.003152  | -2.961318 |
| F  | -0.495130 | 0.718508  | -1.215741 |
| N  | 2.314163  | -1.025972 | 0.067289  |
| H  | 1.921109  | 0.107650  | -2.106758 |
| N  | 1.521082  | -2.009955 | -0.498409 |
| C  | 2.308062  | -2.818320 | -1.224512 |
| C  | 3.630535  | -2.364211 | -1.145303 |
| C  | 3.585965  | -1.238895 | -0.314948 |
| C  | 1.750215  | -3.998290 | -1.954367 |
| H  | 2.036248  | -3.988554 | -3.011423 |
| H  | 2.114369  | -4.939813 | -1.528271 |
| H  | 0.658681  | -4.003445 | -1.895113 |
| H  | 4.502530  | -2.796431 | -1.617935 |
| C  | 4.698673  | -0.359371 | 0.159883  |
| H  | 5.315046  | -0.866488 | 0.911045  |
| H  | 5.360873  | -0.071658 | -0.662860 |
| H  | 4.300944  | 0.551311  | 0.615727  |

YbC6F5-L2IRCfopt (adduit TS2) :

41

scf done: -2496.104932

|    |           |           |           |
|----|-----------|-----------|-----------|
| N  | -1.741017 | 0.933280  | -0.760882 |
| N  | -2.354784 | -0.047577 | -1.459507 |
| C  | -3.514553 | 0.356997  | -2.012620 |
| C  | -3.668017 | 1.687678  | -1.646270 |
| C  | -2.540905 | 2.005482  | -0.868510 |
| Yb | 0.441856  | 0.430843  | 0.251028  |
| F  | -1.273280 | -2.783570 | -2.061526 |
| C  | -0.414919 | -3.075181 | -1.030078 |
| C  | -0.163563 | -4.425378 | -0.807924 |
| C  | 0.686636  | -4.781268 | 0.239711  |
| C  | 1.255871  | -3.794565 | 1.043201  |
| C  | 0.935595  | -2.479239 | 0.737342  |
| C  | 0.118526  | -2.049312 | -0.280083 |
| F  | -0.710291 | -5.385523 | -1.562608 |
| F  | 0.948182  | -6.068509 | 0.476972  |
| F  | 2.063546  | -4.134504 | 2.052461  |
| F  | 1.498895  | -1.490829 | 1.557595  |
| C  | -4.369481 | -0.562086 | -2.818746 |
| C  | -2.187431 | 3.301529  | -0.215583 |
| N  | 1.270475  | 2.361640  | 1.262969  |
| N  | 1.909554  | 2.198590  | 0.047874  |
| C  | 2.806275  | 3.186805  | -0.093656 |
| C  | 2.760483  | 4.012753  | 1.034925  |
| C  | 1.780516  | 3.450451  | 1.860662  |
| C  | 3.671673  | 3.282072  | -1.309846 |
| C  | 1.301068  | 3.892924  | 3.206857  |
| H  | -1.911500 | -0.959528 | -1.534576 |
| H  | -2.946719 | 3.589118  | 0.519247  |
| H  | -1.222402 | 3.237487  | 0.295116  |
| H  | -2.126413 | 4.106536  | -0.954764 |
| H  | -4.487422 | 2.340928  | -1.908763 |
| H  | -4.686335 | -0.080791 | -3.747889 |
| H  | -3.831734 | -1.478470 | -3.074806 |
| H  | -5.272225 | -0.844440 | -2.266851 |
| H  | 4.730702  | 3.145988  | -1.062484 |
| H  | 3.393940  | 2.512979  | -2.035634 |
| H  | 3.575466  | 4.258866  | -1.796405 |
| H  | 0.500192  | 3.237303  | 3.559464  |
| H  | 2.107292  | 3.868658  | 3.948652  |
| H  | 0.915477  | 4.918316  | 3.181979  |
| H  | 3.357615  | 4.894146  | 1.228776  |

YbC6F5-L2 (TS2) :

41

scf done: -2496.090316

|    |           |           |           |
|----|-----------|-----------|-----------|
| N  | 1.514511  | 1.764125  | -1.124361 |
| N  | 1.319902  | 0.549239  | -1.720290 |
| C  | 0.173906  | 0.566734  | -2.420691 |
| C  | -0.399461 | 1.832638  | -2.280198 |
| C  | 0.477173  | 2.550665  | -1.459731 |
| Yb | 3.656790  | 1.283922  | -0.264104 |
| F  | 3.168574  | -1.994976 | -3.434258 |
| C  | 3.544741  | -2.222419 | -2.164258 |
| C  | 4.255382  | -3.392613 | -1.910333 |
| C  | 4.657247  | -3.676440 | -0.604851 |
| C  | 4.356551  | -2.791806 | 0.428383  |
| C  | 3.628973  | -1.656546 | 0.098582  |
| C  | 3.205438  | -1.313499 | -1.169390 |
| F  | 4.557766  | -4.248606 | -2.886457 |
| F  | 5.342401  | -4.787462 | -0.348724 |
| F  | 4.756038  | -3.047206 | 1.673860  |
| F  | 3.367681  | -0.764507 | 1.133600  |
| C  | -0.310774 | -0.634829 | -3.166127 |
| C  | 0.388406  | 3.963928  | -0.980873 |
| N  | 5.128817  | 2.733193  | 0.738149  |
| N  | 5.594364  | 2.478326  | -0.540130 |
| C  | 6.724637  | 3.177429  | -0.723281 |
| C  | 7.009825  | 3.899815  | 0.440751  |
| C  | 5.976644  | 3.587635  | 1.331151  |
| C  | 7.479606  | 3.110385  | -2.012495 |
| C  | 5.748037  | 4.064717  | 2.730006  |
| H  | 2.231660  | -0.394903 | -1.477175 |
| H  | -0.537699 | 4.138270  | -0.422886 |
| H  | 1.229050  | 4.203945  | -0.324049 |
| H  | 0.402840  | 4.670928  | -1.817352 |
| H  | -1.323548 | 2.182558  | -2.719493 |
| H  | -0.886375 | -0.336905 | -4.046416 |
| H  | 0.527091  | -1.252678 | -3.498955 |
| H  | -0.961937 | -1.258564 | -2.542432 |
| H  | 8.475796  | 2.675280  | -1.873505 |
| H  | 6.940707  | 2.495218  | -2.737960 |
| H  | 7.618310  | 4.105832  | -2.448024 |
| H  | 4.853353  | 3.597845  | 3.150566  |
| H  | 6.595104  | 3.821207  | 3.380685  |
| H  | 5.612377  | 5.151424  | 2.767216  |
| H  | 7.850088  | 4.558886  | 0.614904  |

YbC6F5-L2IRCropt (produit TS2) :

41

scf done: -2496.115900

|    |           |           |           |
|----|-----------|-----------|-----------|
| N  | -1.820408 | 1.243776  | -0.463170 |
| N  | -1.303799 | 0.919424  | -1.703404 |
| C  | -2.333144 | 0.699178  | -2.540898 |
| C  | -3.536036 | 0.870025  | -1.845393 |
| C  | -3.160057 | 1.219671  | -0.542759 |
| Yb | 0.493486  | 1.324404  | -0.241288 |
| F  | -3.176587 | -3.471514 | -1.050327 |
| C  | -2.025590 | -3.400197 | -0.384817 |
| C  | -1.618985 | -4.508363 | 0.356961  |
| C  | -0.418502 | -4.461842 | 1.061626  |
| C  | 0.371323  | -3.314116 | 1.026541  |
| C  | -0.071440 | -2.235084 | 0.273652  |
| C  | -1.257706 | -2.244349 | -0.436419 |
| F  | -2.364959 | -5.608414 | 0.397777  |
| F  | -0.023218 | -5.513210 | 1.771211  |
| F  | 1.518454  | -3.264091 | 1.697851  |
| F  | 0.727041  | -1.123943 | 0.256252  |
| C  | -2.104731 | 0.356703  | -3.979273 |
| C  | -4.014780 | 1.541911  | 0.641480  |
| N  | 1.936384  | 2.631121  | 1.029637  |
| N  | 2.234471  | 2.842720  | -0.304450 |
| C  | 3.222607  | 3.747861  | -0.376885 |
| C  | 3.583942  | 4.137176  | 0.917561  |
| C  | 2.744550  | 3.407790  | 1.767236  |
| C  | 3.770565  | 4.194826  | -1.694896 |
| C  | 2.667164  | 3.409686  | 3.260976  |
| H  | -1.573932 | -1.379622 | -1.014703 |
| H  | -4.724927 | 0.736233  | 0.857285  |
| H  | -3.393548 | 1.696333  | 1.527726  |
| H  | -4.599651 | 2.453955  | 0.477277  |
| H  | -4.540480 | 0.764590  | -2.233726 |
| H  | -2.375666 | 1.190562  | -4.637207 |
| H  | -1.050610 | 0.124350  | -4.153908 |
| H  | -2.703136 | -0.506808 | -4.287997 |
| H  | 4.839942  | 3.972433  | -1.784085 |
| H  | 3.250142  | 3.689976  | -2.513274 |
| H  | 3.651665  | 5.275157  | -1.834264 |
| H  | 1.893968  | 2.715696  | 3.601679  |
| H  | 3.617863  | 3.107597  | 3.714655  |
| H  | 2.424115  | 4.404663  | 3.650501  |
| H  | 4.346797  | 4.850661  | 1.200397  |

YbL2:

29

scf done: -1767.993666

|    |           |           |           |
|----|-----------|-----------|-----------|
| C  | 0.960760  | 0.596236  | -0.294671 |
| C  | -0.210296 | -0.146402 | -0.108486 |
| C  | -0.001550 | -0.870747 | 1.070371  |
| N  | 1.214525  | -0.580693 | 1.557839  |
| N  | 1.814153  | 0.333577  | 0.707094  |
| C  | -0.907571 | -1.835200 | 1.767594  |
| C  | 1.317760  | 1.552444  | -1.387961 |
| H  | -1.088809 | -0.157886 | -0.740084 |
| H  | 0.601864  | 2.379644  | -1.448435 |
| H  | 2.310518  | 1.976365  | -1.214281 |
| H  | 1.326710  | 1.059732  | -2.366704 |
| Yb | 3.309226  | -0.089940 | 2.422064  |
| H  | -1.161785 | -2.685180 | 1.124568  |
| H  | -0.427526 | -2.225052 | 2.669266  |
| H  | -1.849451 | -1.360116 | 2.063854  |
| N  | 5.399301  | -0.469593 | 3.352077  |
| N  | 4.808624  | 0.563463  | 4.061559  |
| C  | 5.664232  | 0.958612  | 5.016808  |
| C  | 6.827667  | 0.185056  | 4.941491  |
| C  | 6.612151  | -0.698808 | 3.878381  |
| C  | 7.508752  | -1.762235 | 3.328416  |
| H  | 7.023246  | -2.276265 | 2.494415  |
| H  | 8.453338  | -1.343161 | 2.963992  |
| H  | 7.758467  | -2.510851 | 4.088527  |
| H  | 7.705461  | 0.255472  | 5.570265  |
| C  | 5.317648  | 2.067943  | 5.958325  |
| H  | 6.021875  | 2.903100  | 5.872922  |
| H  | 4.314998  | 2.448610  | 5.745658  |
| H  | 5.338539  | 1.731875  | 7.000967  |

HC6F5

12

scf done: -727.958130

|   |           |           |           |
|---|-----------|-----------|-----------|
| C | -0.082569 | 0.107328  | -0.046268 |
| C | -0.128724 | -0.230019 | 1.340361  |
| C | 1.021075  | 0.084859  | 2.045628  |
| C | 2.194435  | 0.251947  | 1.266498  |
| C | 2.280568  | 0.088570  | -0.139811 |
| C | 1.094584  | -0.226172 | -0.782182 |
| F | -1.140046 | -0.827395 | 1.952313  |
| F | 1.163289  | -0.032705 | 3.372198  |
| F | 3.325210  | 0.461486  | 1.918494  |
| F | 3.499843  | -0.025822 | -0.681992 |
| F | 1.118234  | -0.819943 | -1.965907 |
| H | 0.203329  | 1.167863  | 0.120667  |
